# Supplementary material for: A fast nucleic acid extraction system for point-of-care and integration of digital PCR
Source: Royal Society of Chemistry journal article supplement (doi:10.1039/c9an01067j), 2019-01-01
Supplement: c9an01067j1.pdf [file c9an01067j1.pdf]

### Supporting information

#### **A fast nucleic acid extraction system for point-of-care and integration of digital PCR**

Juxin Yin<sup>a</sup>, Jiumei Hu<sup>a</sup>, Jingjing Sun<sup>a</sup>, Ben Wang<sup>bc</sup>, Ying Mu<sup>a</sup>

- a. Research Centre for Analytical Instrumentation, Institute of Cyber-Systems and Control, State Key Laboratory of Industrial Control Technology, Zhejiang University, Hangzhou, Zhejiang Province, 310058, P. R. China.
- b. Cancer Institute (Key Laboratory of Cancer Prevention and Intervention, National Ministry of Education), The Second Affiliated Hospital, Zhejiang University School of Medicine, Hangzhou, 310009 China;
- c. Institute of Translational Medicine, Zhejiang University, Hangzhou, 310029 China;

✉Corresponding author: [muying@zju.edu.cn](mailto:muying@zju.edu.cn)

### **DNA extraction procedure using traditional method**

1. Add 1µL, 3µL, 5µL, 7µL sample to a nuclease-free 1.5 mL tube. Add 10 mM Tris-HCl, PBS, or Elution Buffer to bring the volume up to 200 µL.
2. Add 200 µL Buffer MSL and 20 µL OB Protease to the tube. Mix thoroughly by vortexing 30 seconds.
3. Incubate sample at 65°C for 15 min. Briefly vortex the tube during incubation.
4. Add 300 µL absolute ethanol and 20 µL Mag-Bind Particles CND to the lysate. Vortex 30 seconds to mix reagents.
5. Place the tube on a magnetic separation device to magnetize the magnetic particles. Incubate at room temperature for 10 minutes.
6. Completely remove and discard the cleared supernatant. Remove any droplets of liquid from the wall of the tube.
7. Remove the tube from the magnetic separation device. Then add 600 µL Buffer MP/Ethanol mixture to the sample.
8. Resuspend the Mag-Bind particles pellet by vortexing 30 seconds.
9. Place the tube onto the magnetic separation device to magnetize the Mag-Bind particles. Completely remove and discard the cleared supernatant.
10. Remove the tube containing the Mag-Bind particles from the magnetic separation device. Add 700 µL SPM Buffer to the sample.
11. Resuspend the Mag-Bind particles pellet by vortexing.
12. Place the tube onto the magnetic separation device to magnetize the magnetic particles. Completely remove and discard the cleared supernatant.
13. Remove the tube containing the Mag-Bind particles from the magnetic separation device. Add 700 µL SPM Buffer to the sample.
14. Resuspend the Mag-Bind particles pellet by vortexing.
15. Place the tube onto the magnetic separation device to magnetize the magnetic particles. Completely remove and discard the cleared supernatant.
16. Air drying the tube on the magnetic separation device for 10 minutes. And remove any residue liquid with a pipettor.
17. Remove the tube from the magnetic separation device. Resuspend the Mag-Bind particles pellet by vortexing.
18. Add 40 µL Elution Buffer to the sample. Incubate 10 minutes at 65°C.
19. Resuspend the Mag-Bind particles by vortexing.
20. Place the tube onto a magnetic separation device to magnetize the Mag-Bind particles.
21. Transfer the cleared supernatant containing purified DNA to a new 1.5 mL tube.

### **Traditional RNA extraction procedure**

1. Add 20  $\mu$ L 2-mercaptoethanol per 1 ml of TRK lysis Buffer before use. Then add 400  $\mu$ L of prepared TRK lysis Buffer to 1 $\mu$ L, 3 $\mu$ L, 5 $\mu$ L, 7 $\mu$ L sample.
2. Add 300  $\mu$ L absolute ethanol and 20  $\mu$ L Proteinase K to the sample. Shaking to mix for 1 minutes.
3. Add 10  $\mu$ L magnetic Particles and shaking for 5 minutes.
4. Place the tube on a magnetic separation device to magnetize the magnetic particles.
5. Discard the cleared supernatant.
6. Remove the tube containing the magnetic particles from the magnetic separation device. Add 600  $\mu$ L of MBW Wash Buffer. Shaking the tube at maximum speed for 1 minutes to resuspend magnetic particles pellet.
7. Place the tube onto a magnetic separation device to magnetize the magnetic particles. Aspirate the cleared supernatant.
8. Remove the tube from the magnetic separation device. Add another 600  $\mu$ L of SPR Wash Buffer and resuspend magnetic particles pellet by shaking for 1 minutes.
9. Place the tube onto a magnetic separation device to magnetize the magnetic particles. Aspirate the cleared supernatant and leave the tube to air dry for 10 minutes.
10. Leave the tube on the magnetic separation device. Prepare 100  $\mu$ L DNase I digestion mix by adding 10  $\mu$ L DNase Digestion Buffer, 88.5  $\mu$ L DEPC-Water and 1.5  $\mu$ L DNase I.
11. Add 100  $\mu$ L of DNase I digestion mix and resuspend the magnetic particles by pipetting up and down for 20 times. Incubate at room temperature for 10-15 minutes.
12. Add 400  $\mu$ L SPR Wash Buffer to the sample and mix thoroughly by shaking for 5 minutes.
13. Place the tube onto a magnetic separation device to magnetize the magnetic particles. Aspirate the cleared supernatant.
14. Add 500  $\mu$ L of SPR Wash Buffer and resuspend magnetic particles pellet by vortexing for 30 seconds.
15. Place the tube onto a magnetic separation device to magnetize the Mag-Bind particles.
16. Aspirate and discard the cleared supernatant and remove any liquid drop from tube. Leave the tube on the device to air dry the magnetic particles at room temperature for 7-10 minutes.
17. Add 50 $\mu$ L DEPC Treated water and resuspend magnetic particles pellet by vortexing and down for 20 times. Incubate at room temperature for 3 minutes.
18. Place the tube onto a magnetic separation device to magnetize the Mag-Bind particles.
19. Transfer the cleared supernatant contains purified RNA into a new 1.5 ml tube.

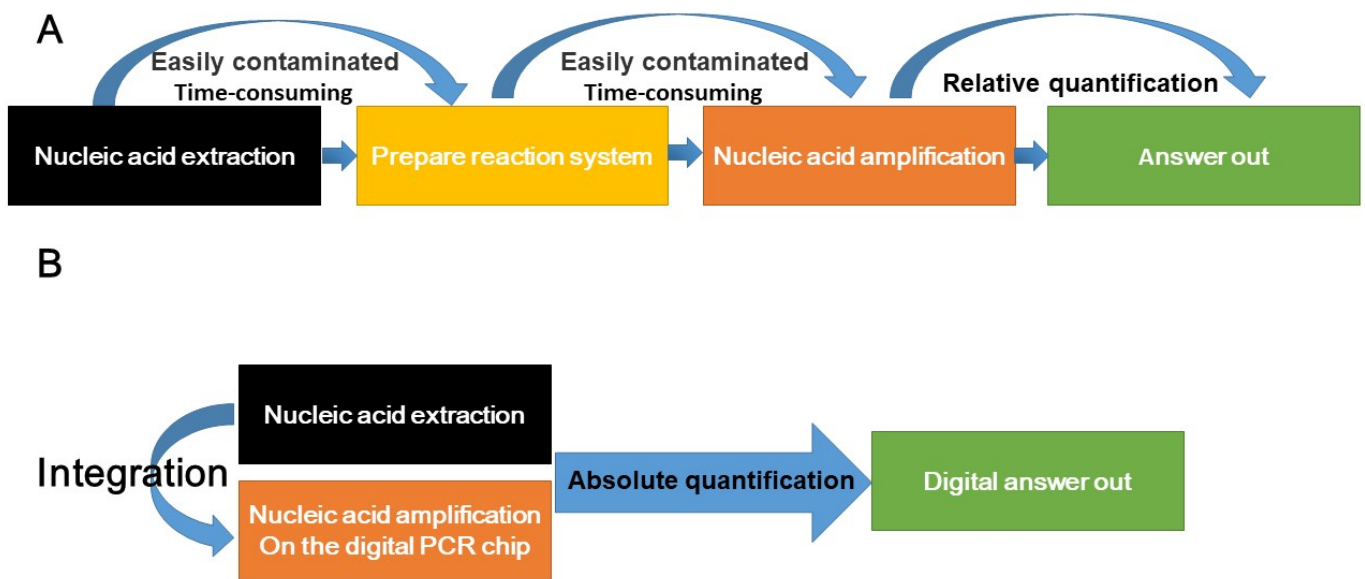

Schematic diagram S1. The advantage of the integration of the nucleic acid extraction and digital PCR. A: Traditional nucleic acid detection process. The transfer of the obtained nucleic acid and the preparation of the nucleic acid amplification system are easily contaminated and time consuming. Meanwhile, the results rely on the standard curve and cannot give accurate results. B: The process of the integration of nucleic acid extraction and digital PCR. The system can reduce the detection process and avoid the pollution. It can give a numerically absolute quantitative result.

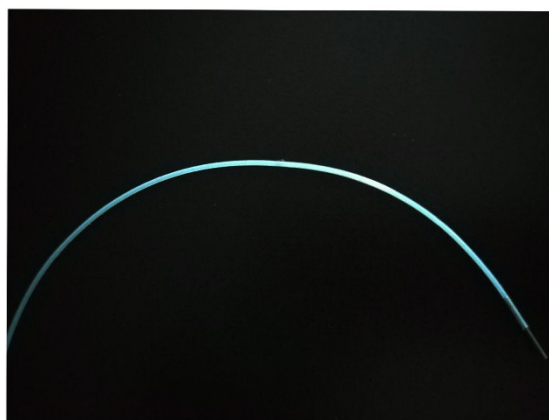

**Figure S1 PTFE tubing for the nucleic acid extraction and integration of digital PCR chips in this research.**

| Table S1 Length corresponding to different volumes in PTFE tubing |            |
|-------------------------------------------------------------------|------------|
| Volumes( $\mu$ L)                                                 | Length(cm) |
| 5                                                                 | 1.25       |
| 10                                                                | 2.5        |
| 15                                                                | 3.75       |
| 20                                                                | 5          |

**Table S2. DNA concentration and purity values of the HepG2 samples using different approaches.**

| Sample<br>volumes( $\mu\text{L}$ ) | Conventional approach                        |                                 |                      | PTFE system                                  |                  |                      |
|------------------------------------|----------------------------------------------|---------------------------------|----------------------|----------------------------------------------|------------------|----------------------|
|                                    | Concentration<br>( $\text{ng}/\mu\text{L}$ ) | Total<br>content( $\text{ng}$ ) | Purity<br>(A260/280) | Concentration<br>( $\text{ng}/\mu\text{L}$ ) | Total<br>content | Purity<br>(A260/280) |
| 1                                  | 0.531 $\pm$ 0.12                             | 21.24                           | 1.81                 | 1.14 $\pm$ 0.23                              | 22.8             | 1.97                 |
| 3                                  | 0.534 $\pm$ 0.27                             | 21.36                           | 1.85                 | 1.39 $\pm$ 0.21                              | 27.8             | 1.95                 |
| 5                                  | 0.667 $\pm$ 0.25                             | 26.68                           | 2.01                 | 1.55 $\pm$ 0.53                              | 31               | 1.98                 |
| 7                                  | 1.293 $\pm$ 0.33                             | 51.72                           | 1.99                 | 3.33 $\pm$ 0.71                              | 66.6             | 1.97                 |

Sample is HepG2 cells and  $C = 1 \times 10^6/\text{mL}$ ,  $n=3$ .

**Table S3. DNA concentration and purity values of the blood samples**

| Sample<br>ID | Conventional approach                        |                                 |                      | PTFE system                                  |                  |                      |
|--------------|----------------------------------------------|---------------------------------|----------------------|----------------------------------------------|------------------|----------------------|
|              | Concentration<br>( $\text{ng}/\mu\text{L}$ ) | Total<br>content( $\text{ng}$ ) | Purity<br>(A260/280) | Concentration<br>( $\text{ng}/\mu\text{L}$ ) | Total<br>content | Purity<br>(A260/280) |
| 1            | 0.16 $\pm$ 0.01                              | 6.5                             | 1.81                 | 0.31 $\pm$ 0.03                              | 6.2              | 1.78                 |
| 2            | 0.28 $\pm$ 0.03                              | 11.1                            | 1.90                 | 0.53 $\pm$ 0.02                              | 10.6             | 1.83                 |
| 3            | 0.25 $\pm$ 0.01                              | 10.0                            | 1.91                 | 0.42 $\pm$ 0.02                              | 8.4              | 1.80                 |
| 4            | 0.27 $\pm$ 0.02                              | 10.8                            | 1.91                 | 0.45 $\pm$ 0.02                              | 9                | 1.93                 |

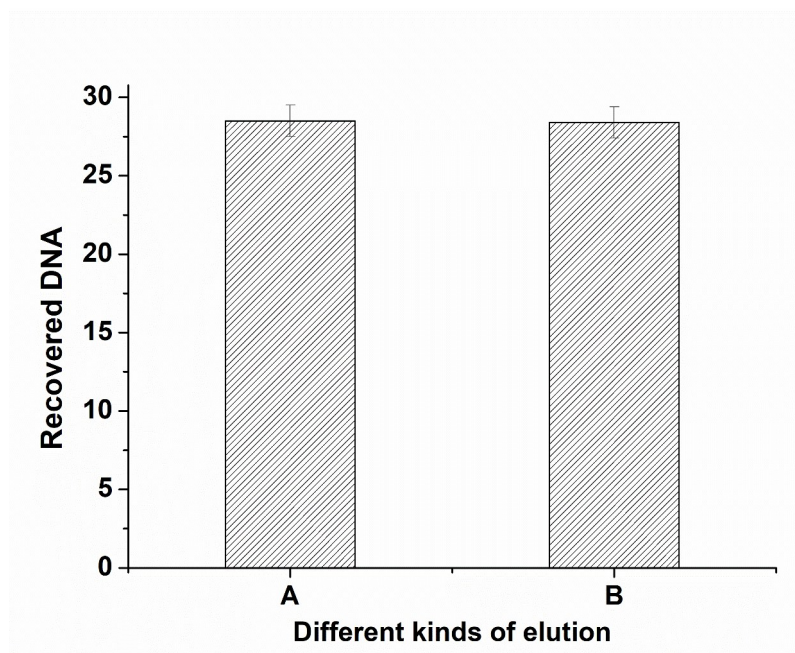

**Figure S2 Comparison of elution effects using different lysis buffer. A: elution buffer from the kit. B: PCR mix**

**Table S4 RNA concentration and purity values from HepG2 samples using different approach**

| Sample<br>volumes( $\mu\text{L}$ ) | Conventional approach                        |                                 |                      | PTFE system                                  |                  |                      |
|------------------------------------|----------------------------------------------|---------------------------------|----------------------|----------------------------------------------|------------------|----------------------|
|                                    | Concentration<br>( $\text{ng}/\mu\text{L}$ ) | Total<br>content( $\text{ng}$ ) | Purity<br>(A260/280) | Concentration<br>( $\text{ng}/\mu\text{L}$ ) | Total<br>content | Purity<br>(A260/280) |
| 1                                  | $1.38 \pm 0.5$                               | 69                              | 1.99                 | $16.3 \pm 1.7$                               | 326              | 2.00                 |
| 3                                  | $4.64 \pm 1.1$                               | 232                             | 1.82                 | $20.2 \pm 2.3$                               | 404              | 1.94                 |
| 5                                  | $6.04 \pm 0.7$                               | 302                             | 1.86                 | $28.2 \pm 2.8$                               | 564              | 1.93                 |
| 7                                  | $16.73 \pm 2.1$                              | 836.5                           | 1.85                 | $34.9 \pm 3.6$                               | 698              | 1.94                 |

Sample is HpG2 cells and  $C = 1 \times 10^6/\text{mL}$ ,  $n=3$ .

**Table S5 Volumetric comparison of reagents required by different methods in different steps**

| Method                | lysing( $\mu\text{L}$ ) | washing( $\mu\text{L}$ ) | elution( $\mu\text{L}$ ) |
|-----------------------|-------------------------|--------------------------|--------------------------|
| Commercial method(CM) | 720                     | 700                      | 50                       |
| PNE system(PS)        | 10                      | 10                       | 20                       |
| CM/PS                 | 72                      | 70                       | 20                       |

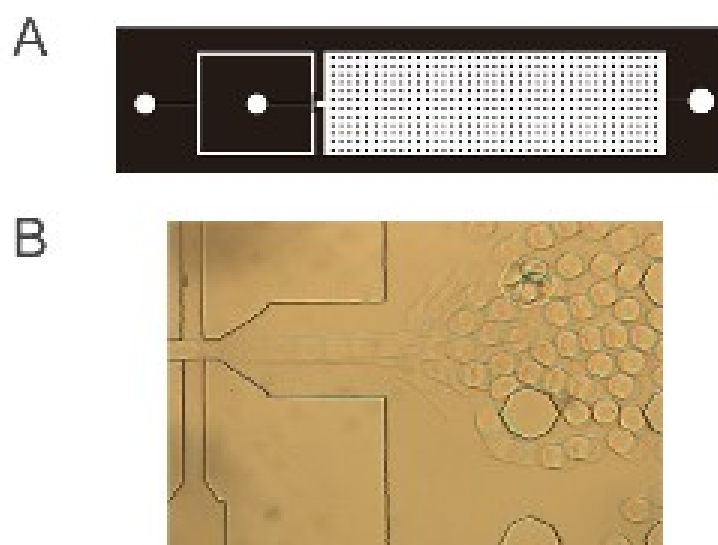

**Figure S3 Schematic diagram of droplet digital PCR (ddPCR) chip used in this study. A: the design of ddPCR chip. B: Using a PTFE tube loaded with the reaction solution to generate droplets.**
